# Supplementary material for: Zaxinone synthase controls arbuscular mycorrhizal colonization level in rice
Source: PubMed Central journal article supplement (PMC9543690; doi:10.1111/tpj.15917), 2022-08-17
Supplement: TPJ-111-1688-s001.pdf [file TPJ-111-1688-s001.pdf]

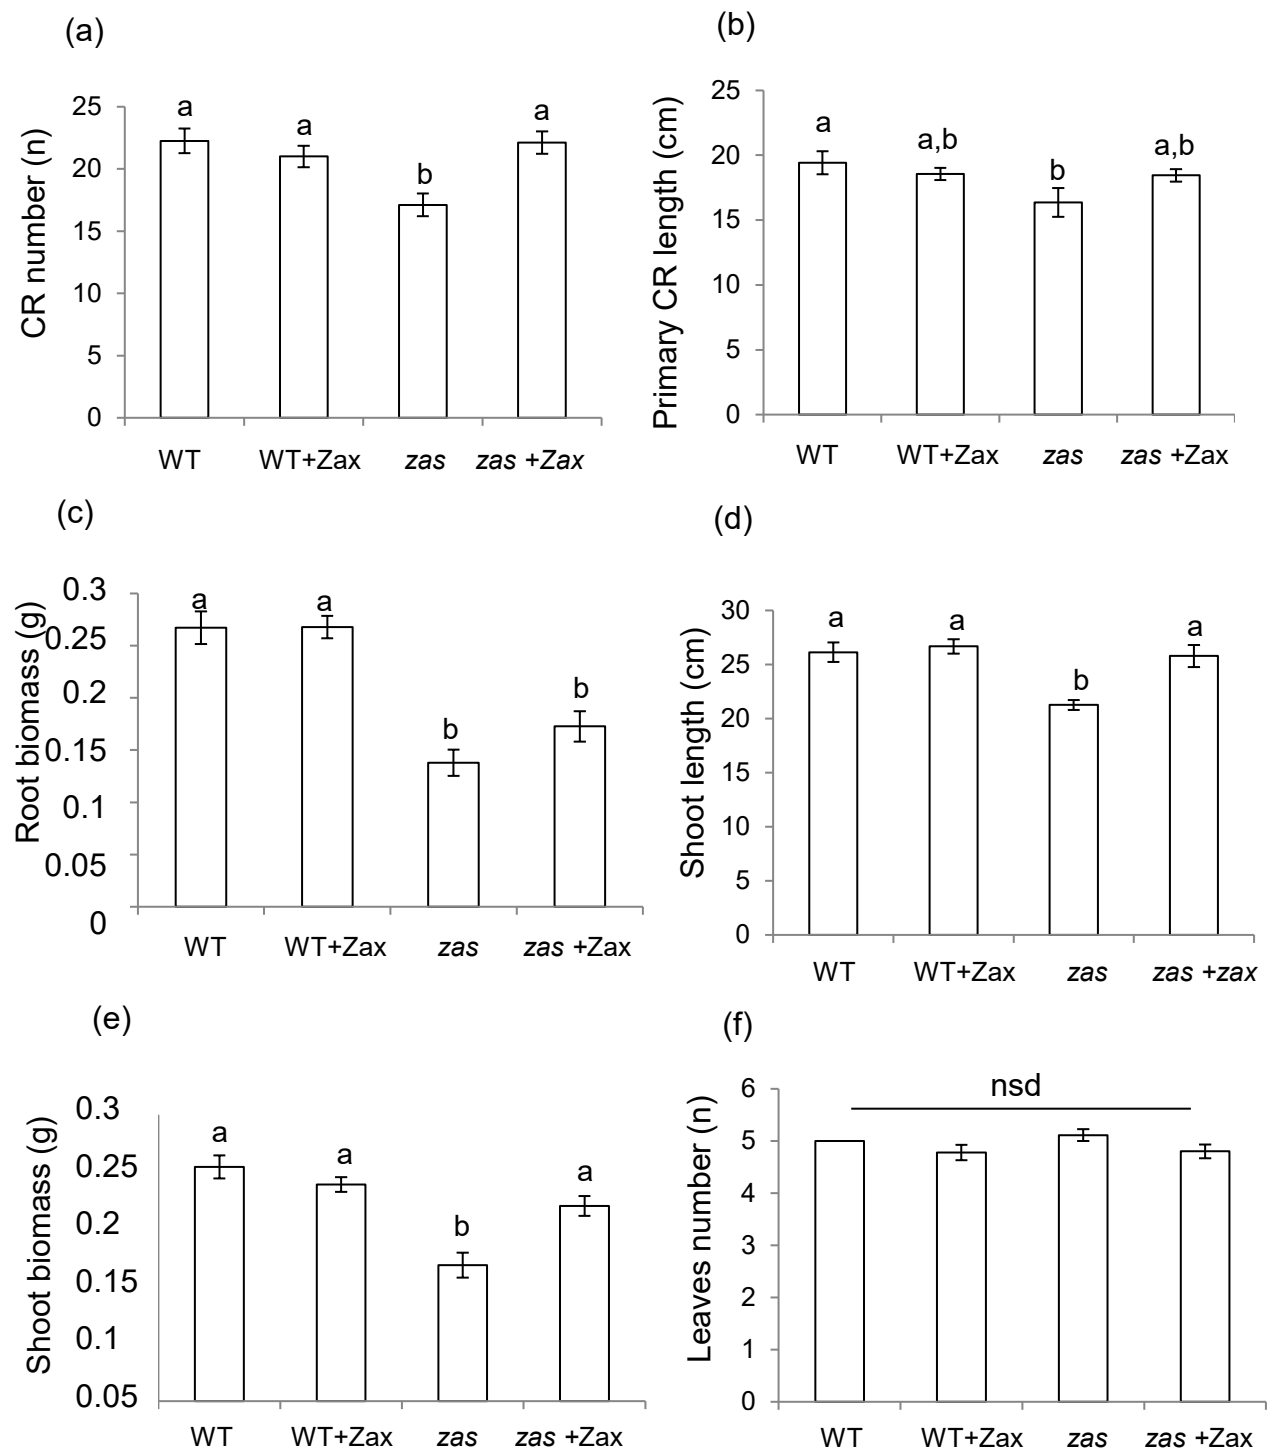

Figure S1

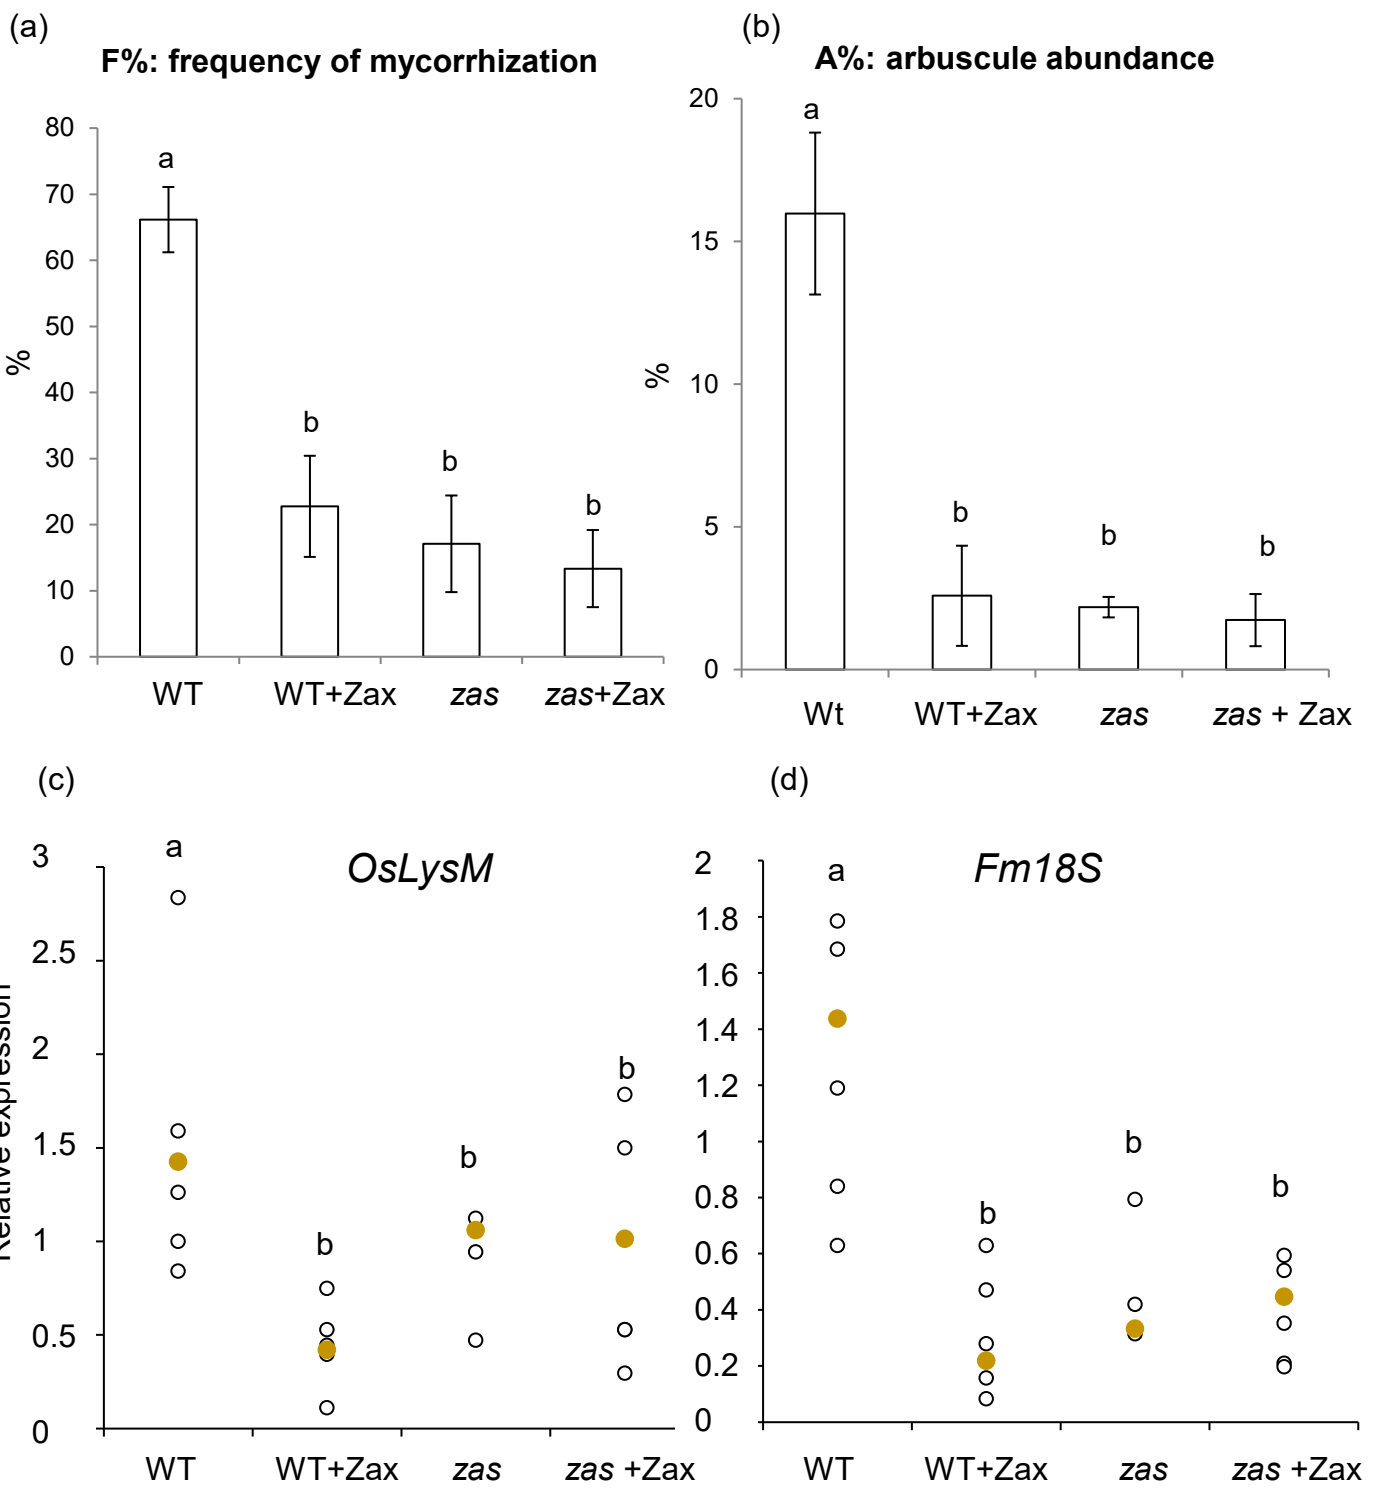

Figure S2

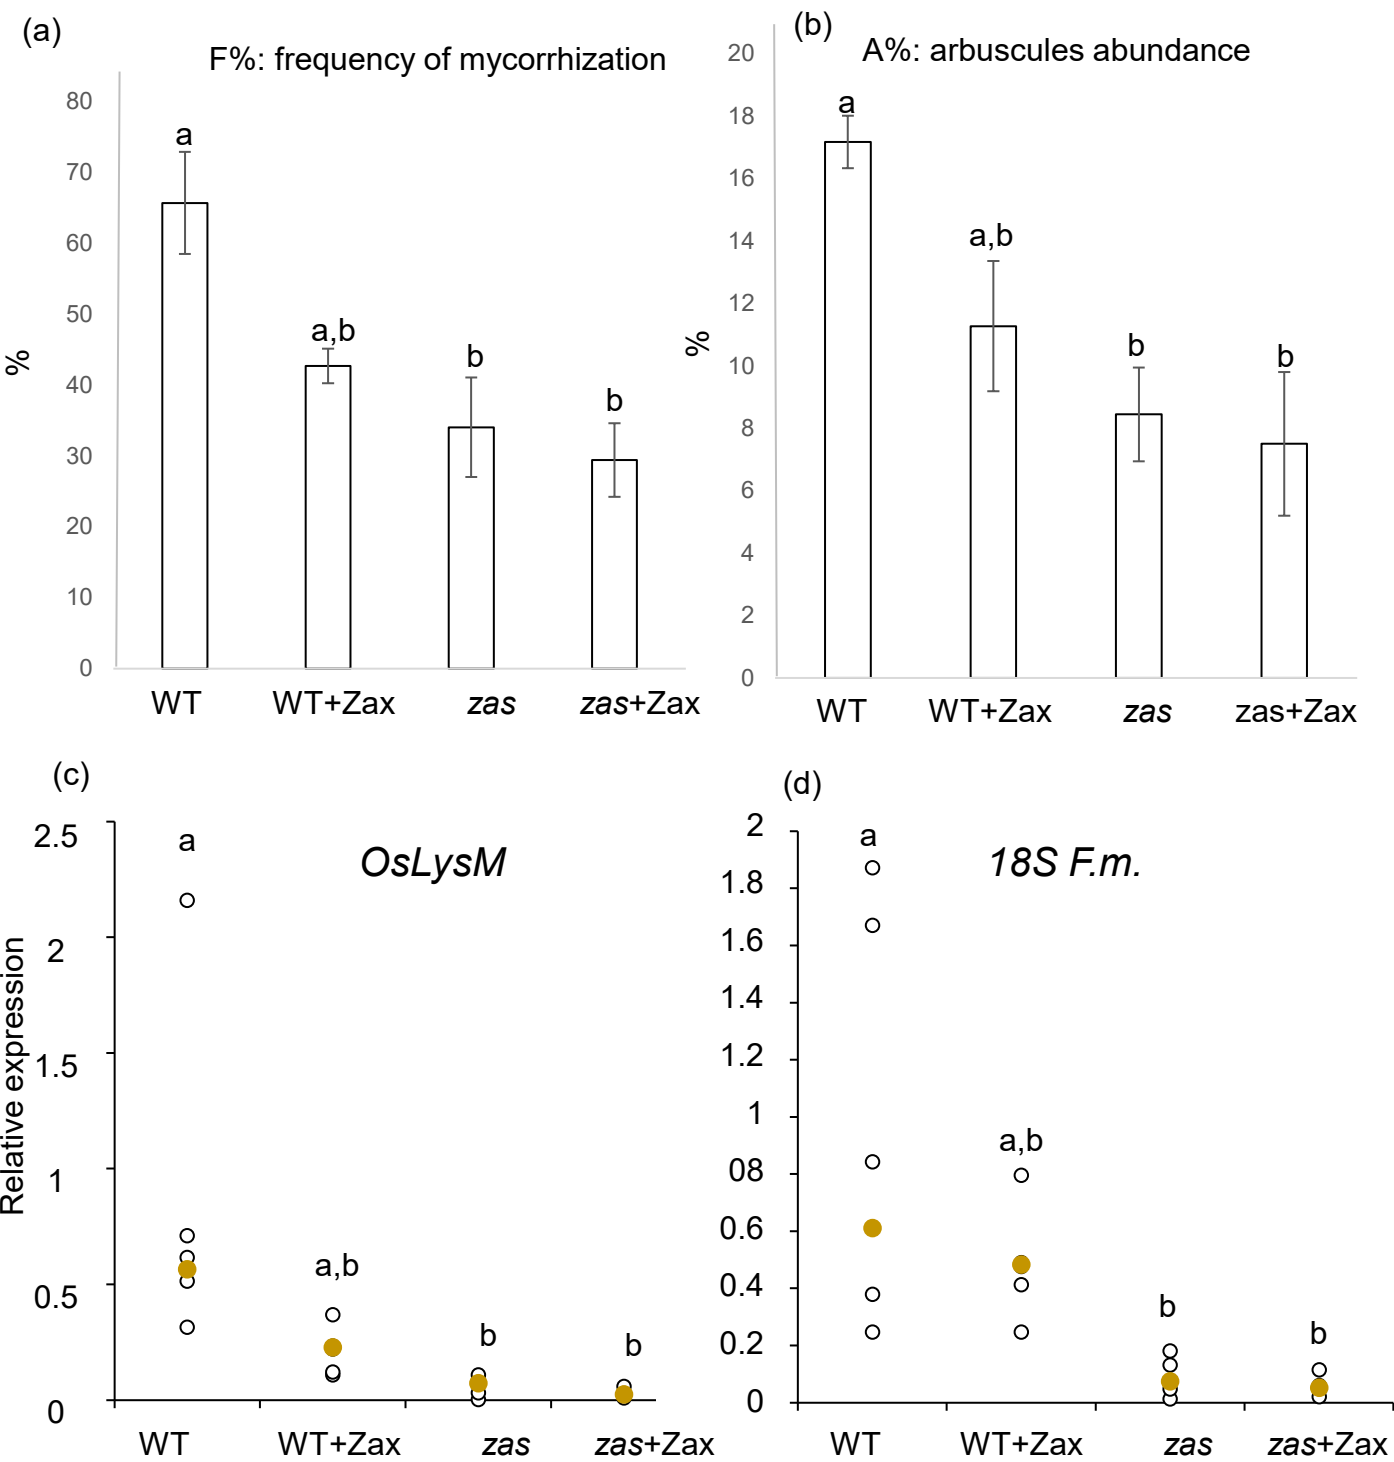

Figure S3

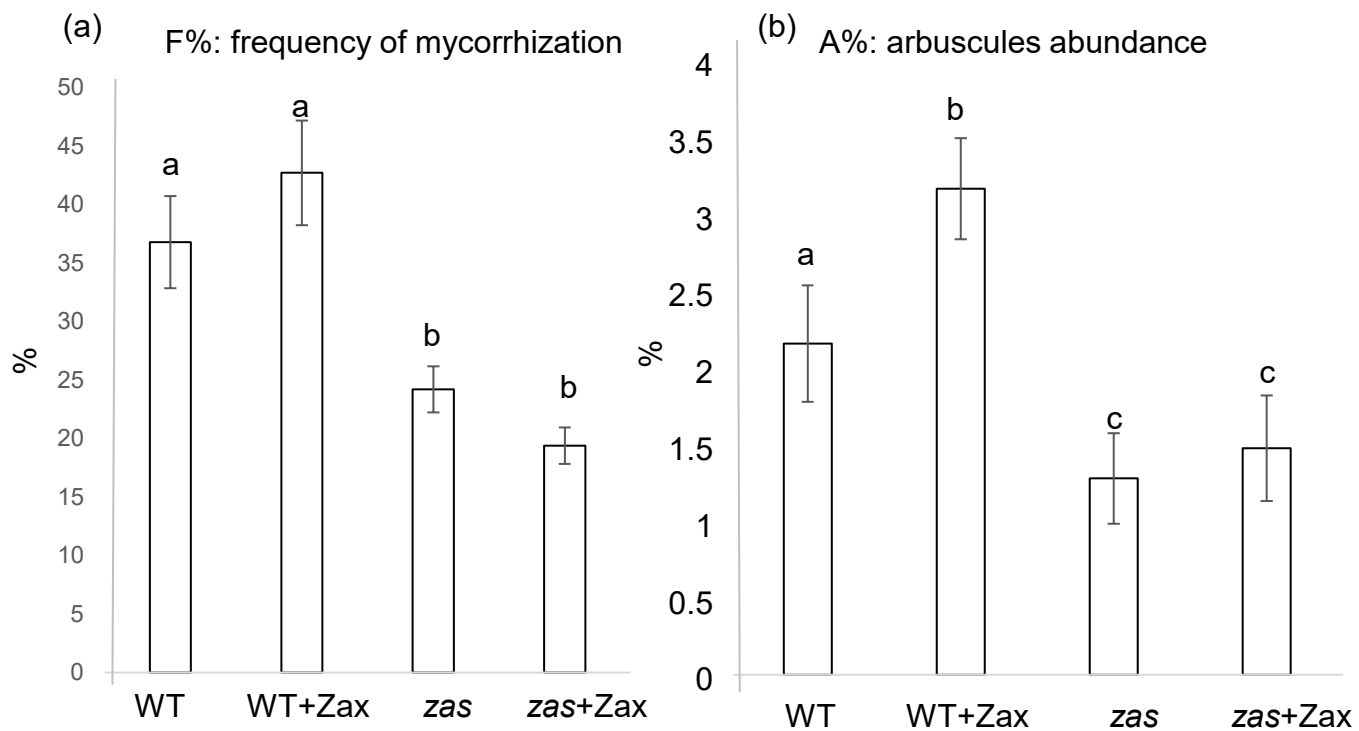

Figure S4

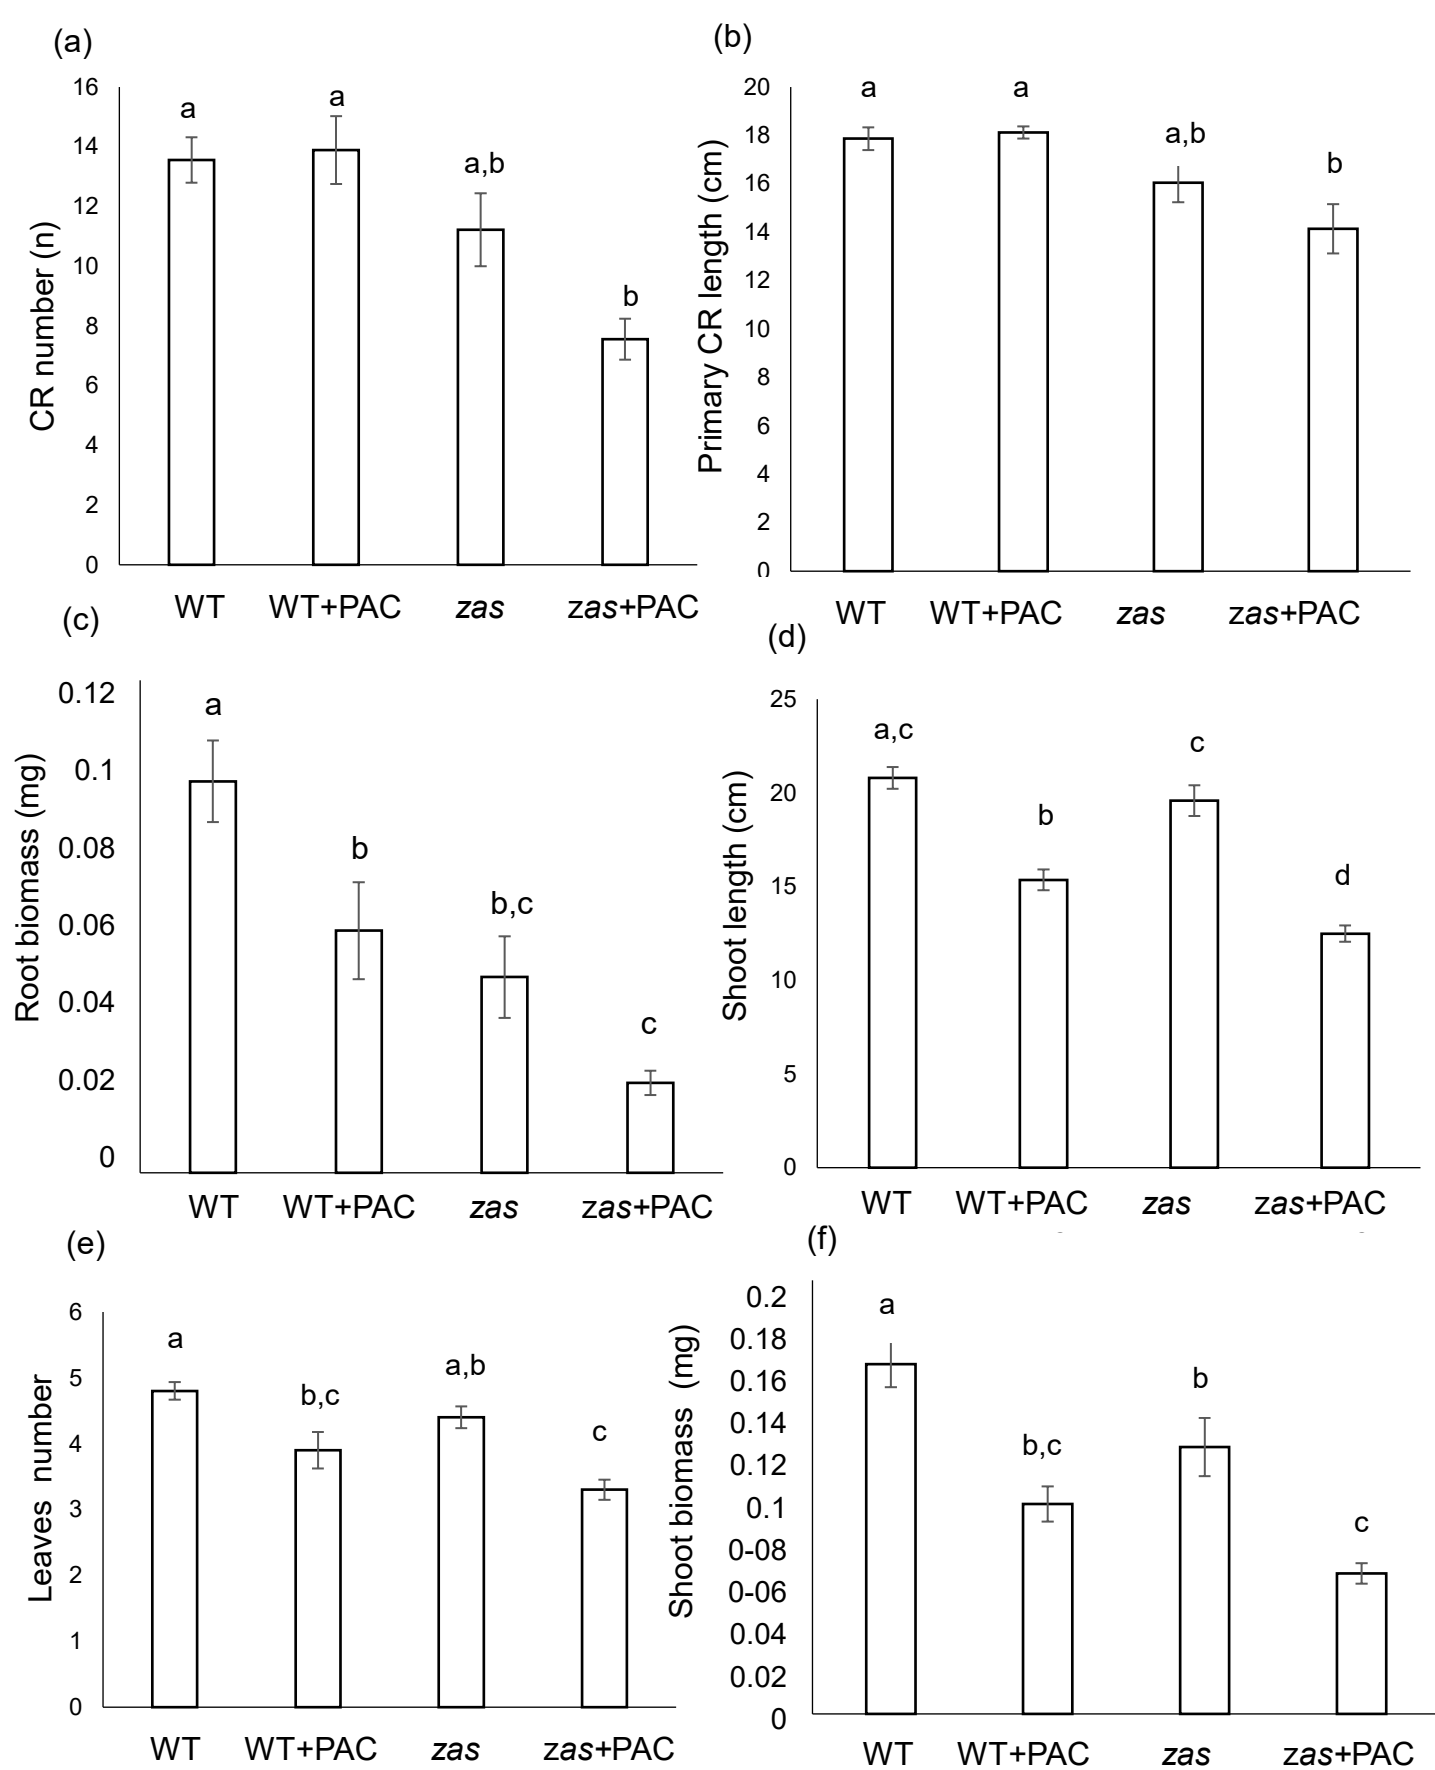

Figure S5

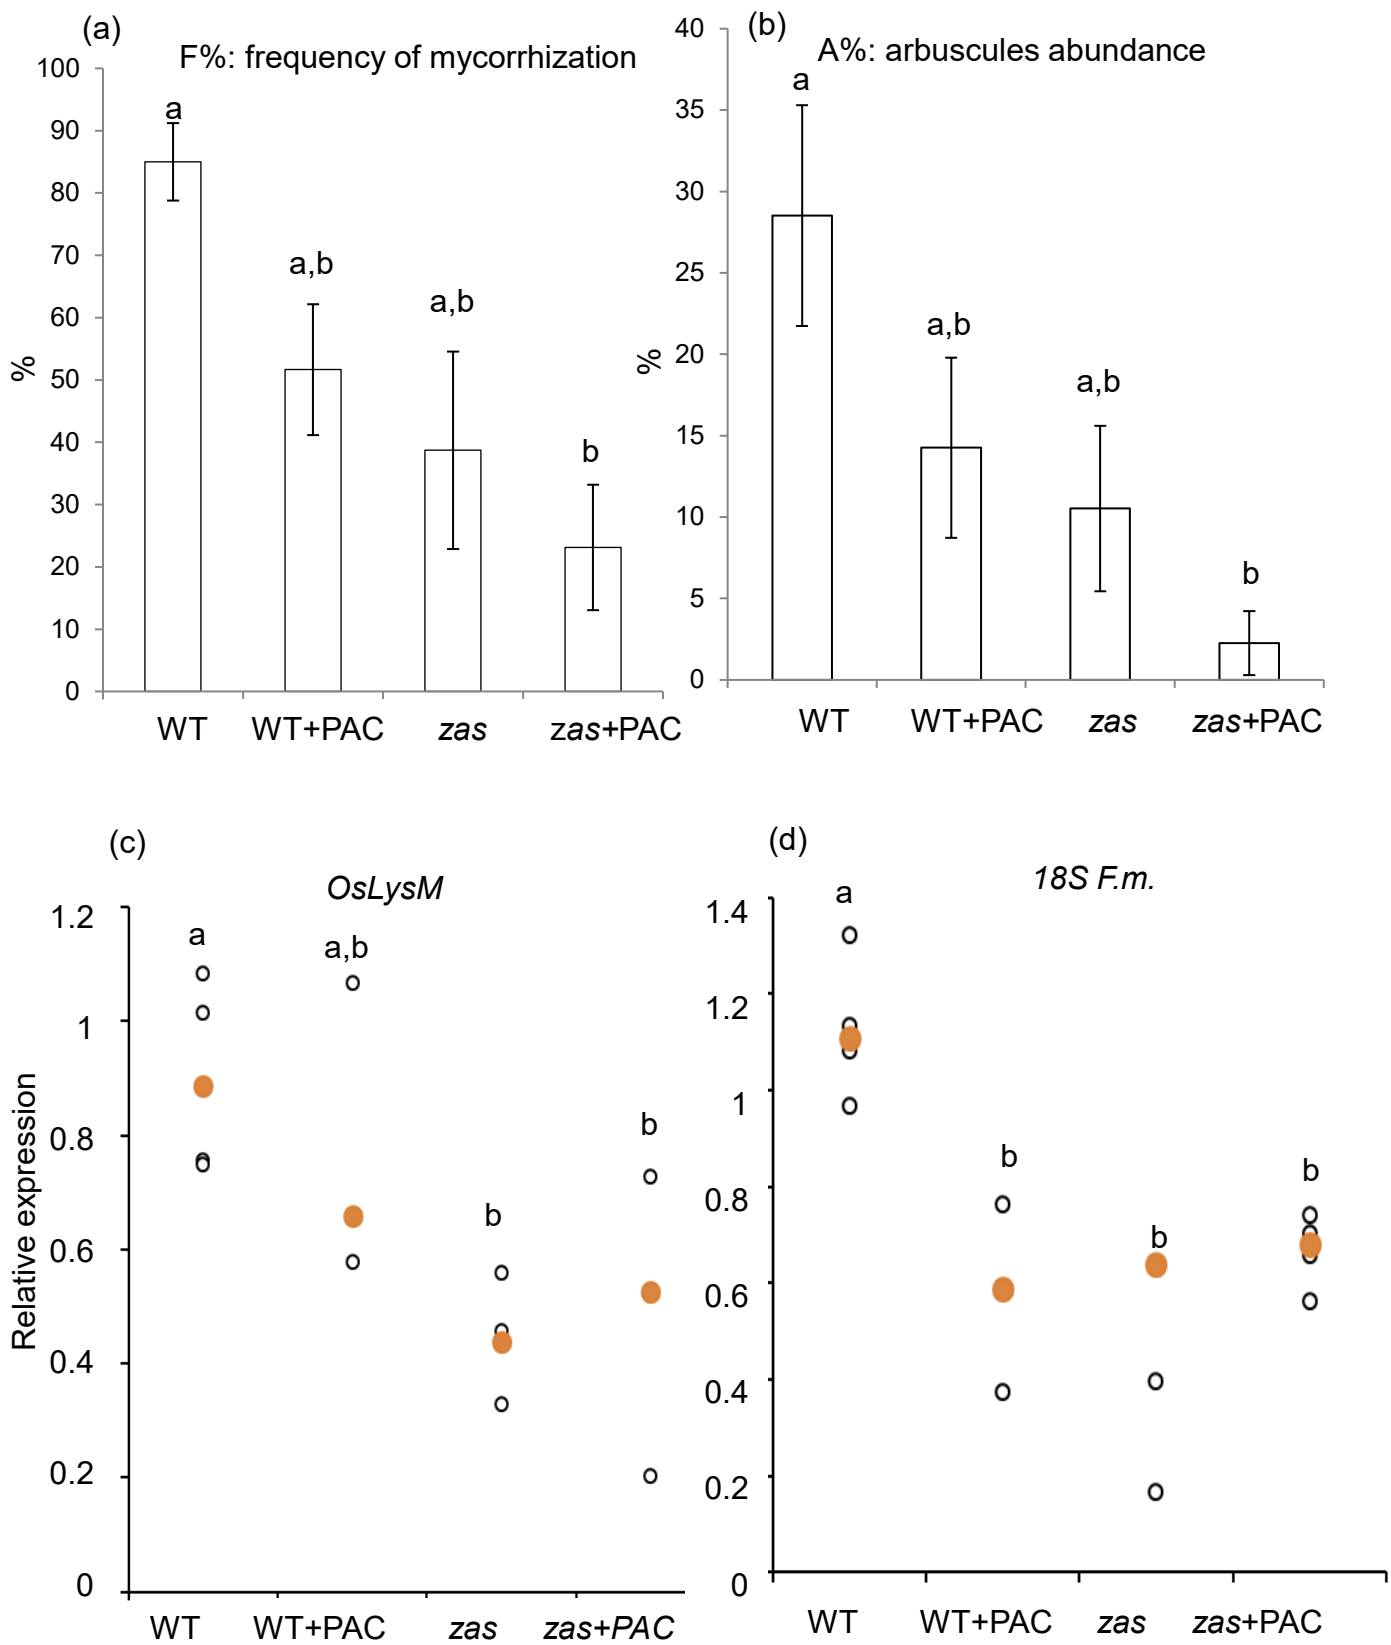

Figure S6

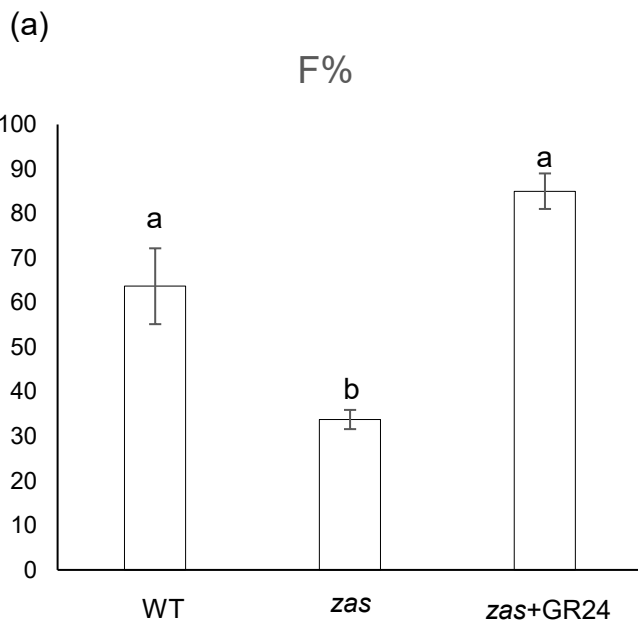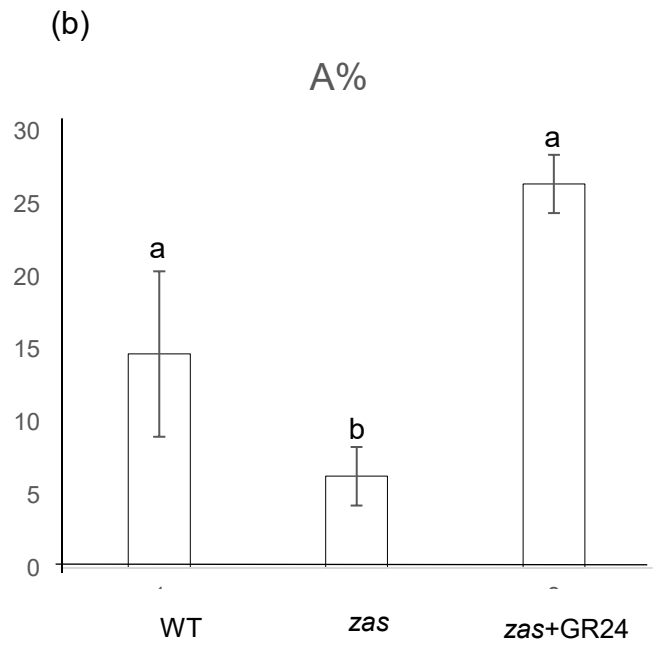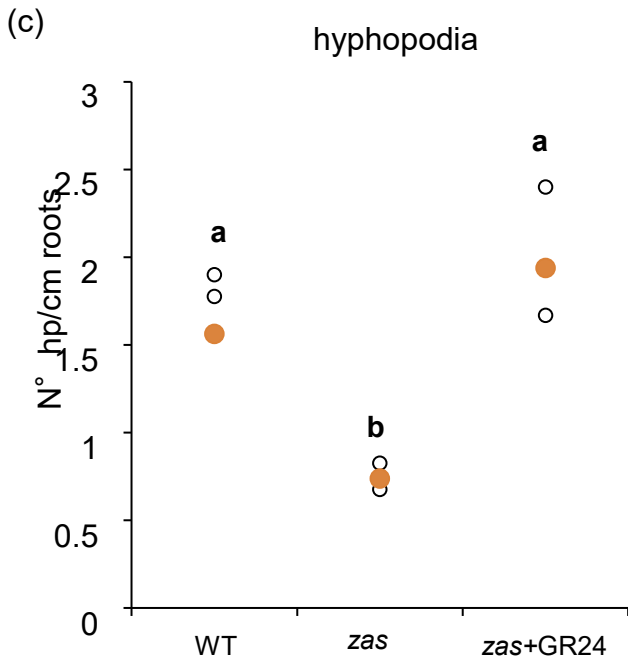

Figure S7

□ Mock    ■ 1  $\mu$ M GR24

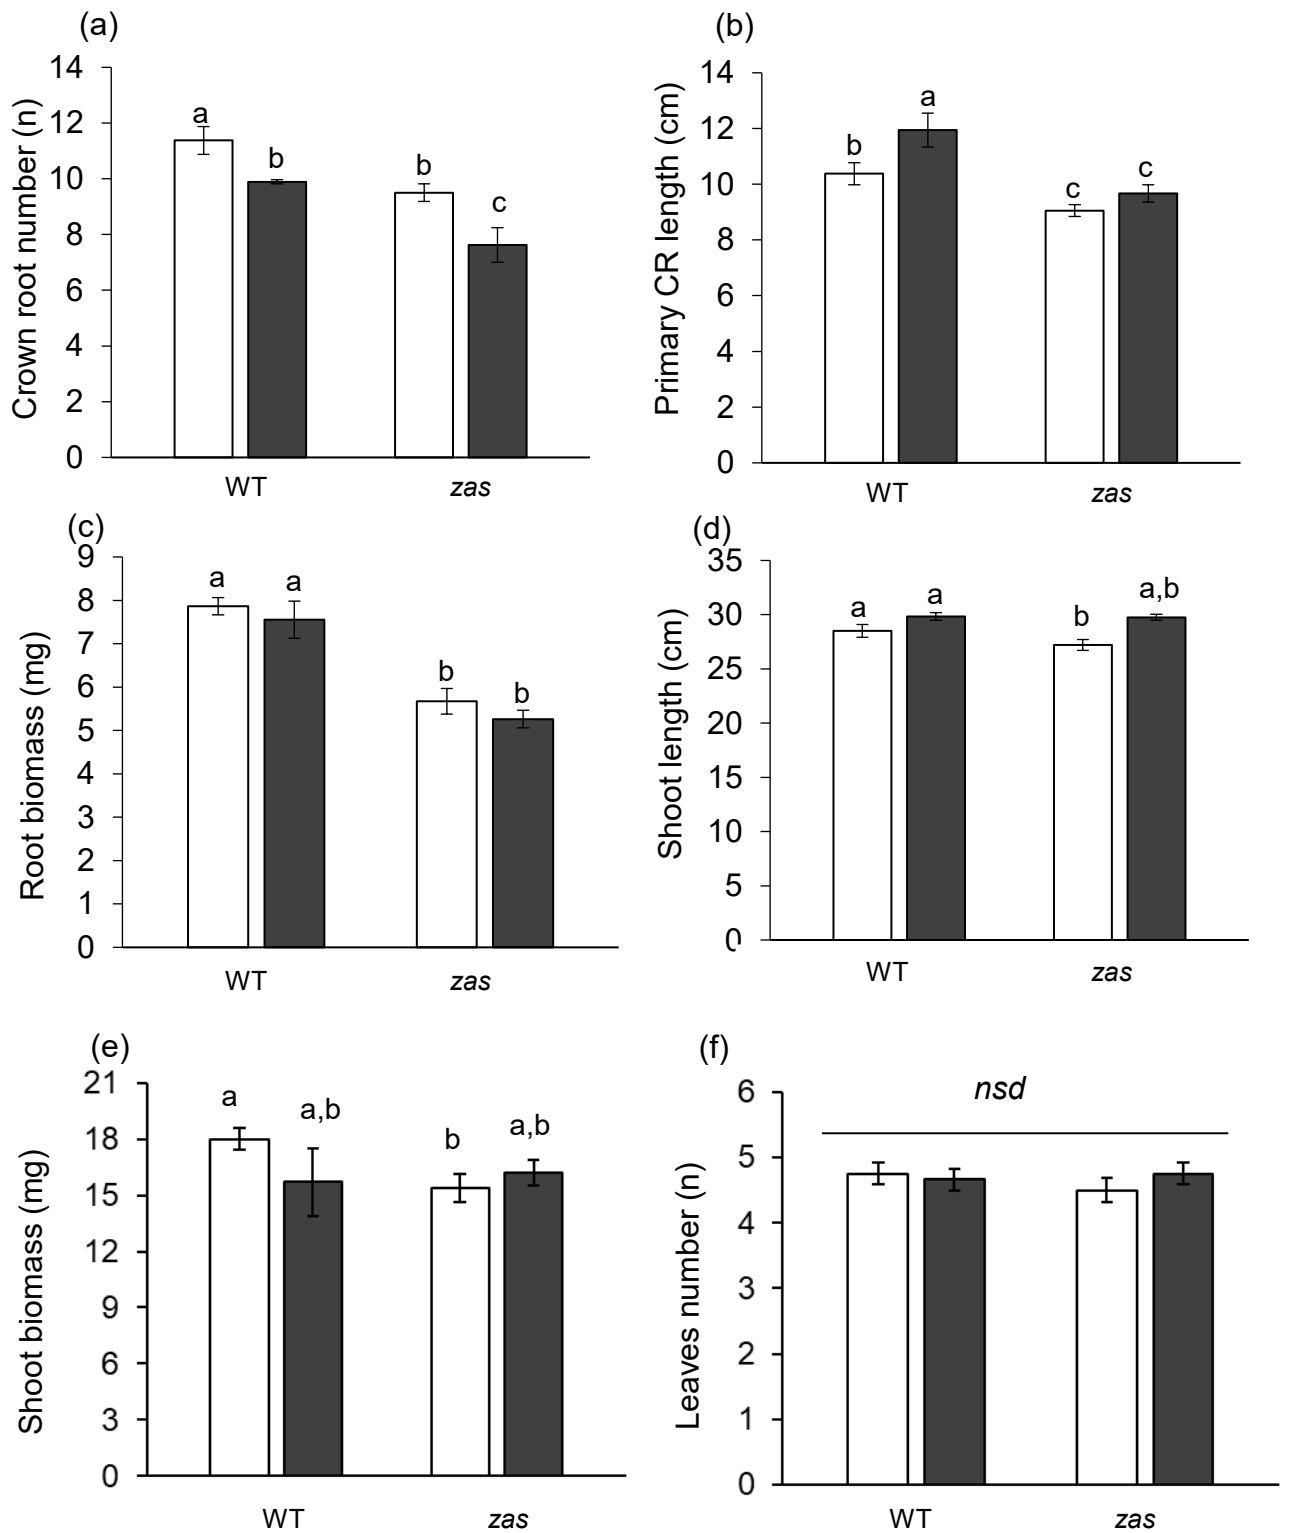

Figure S8



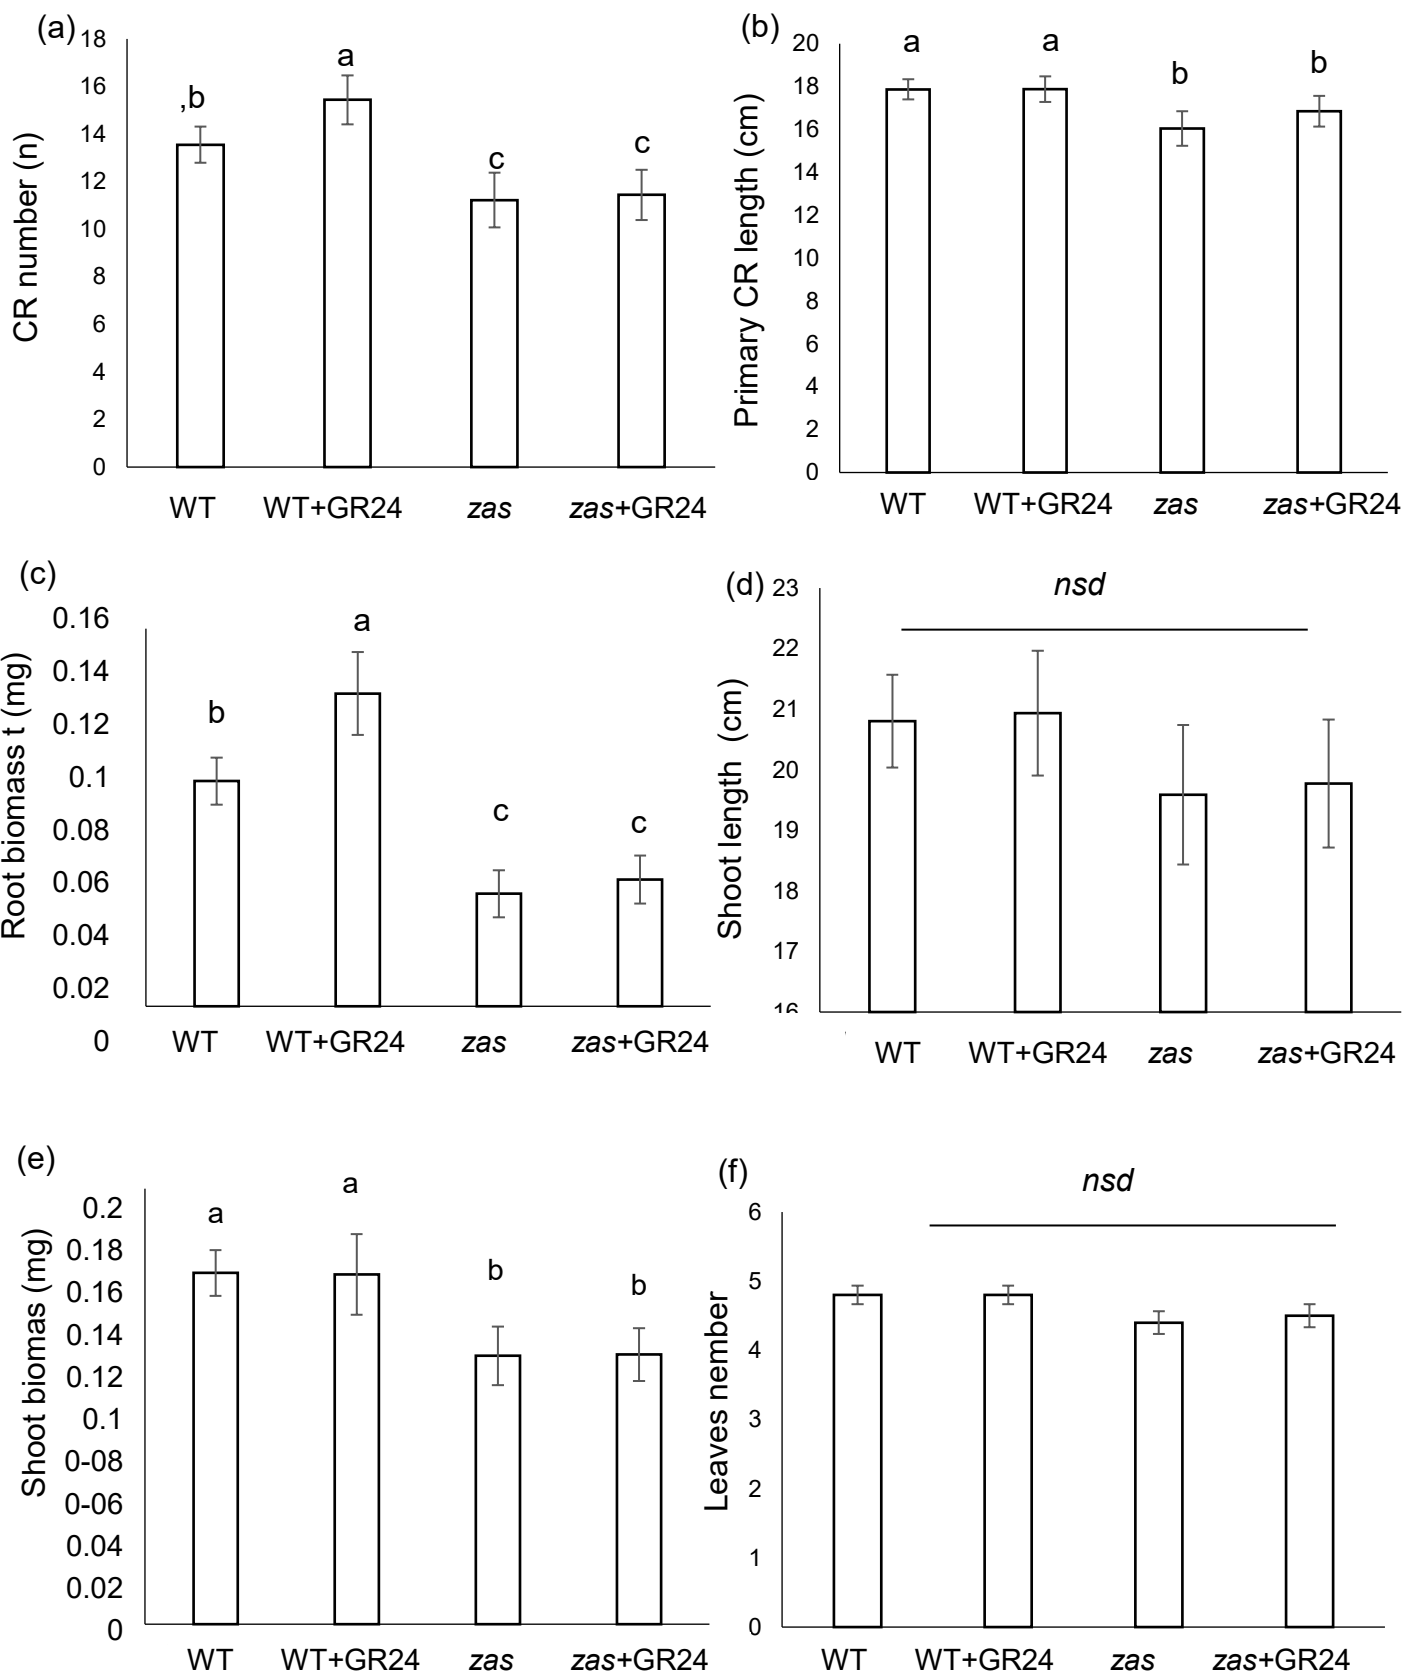

Figure S9

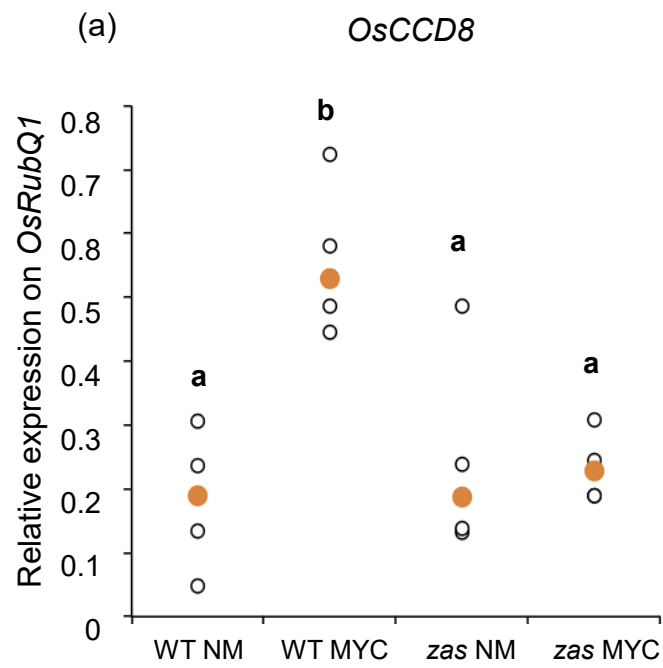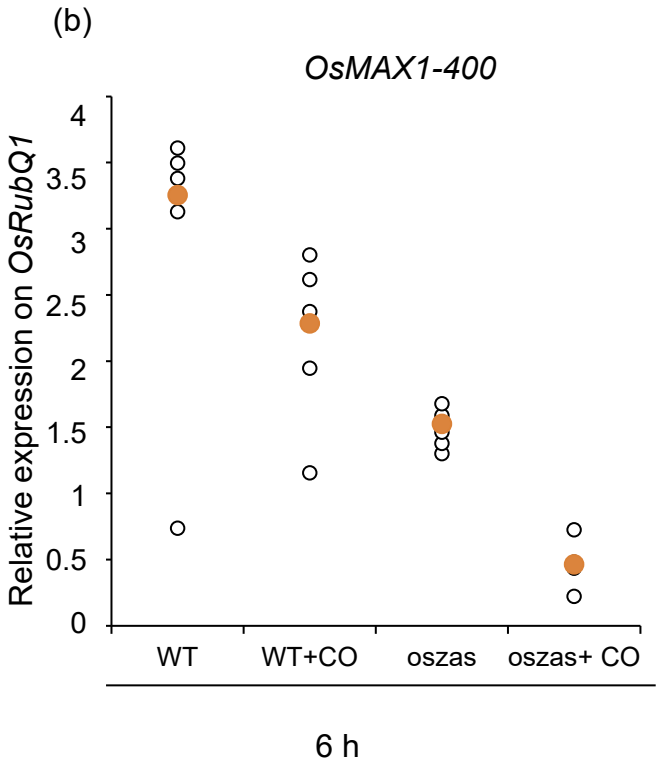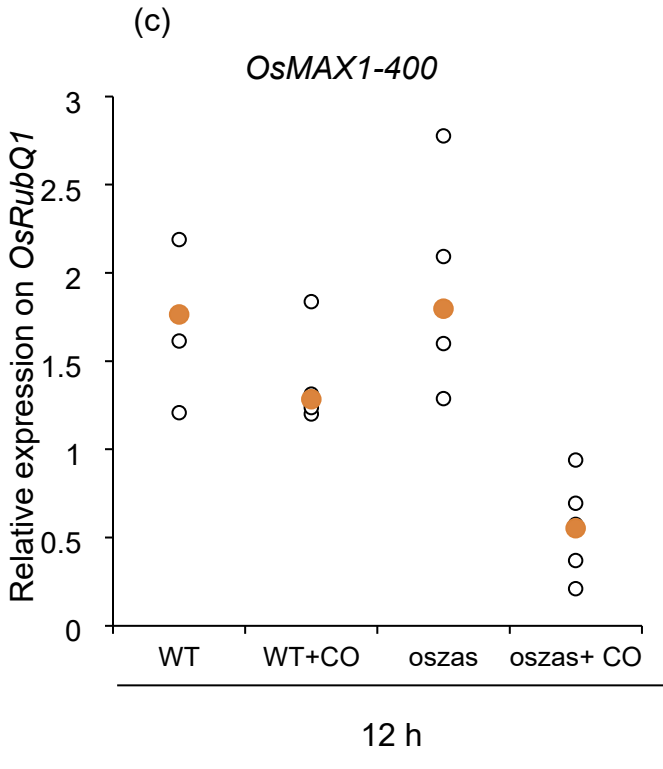

Figure S10

(a)

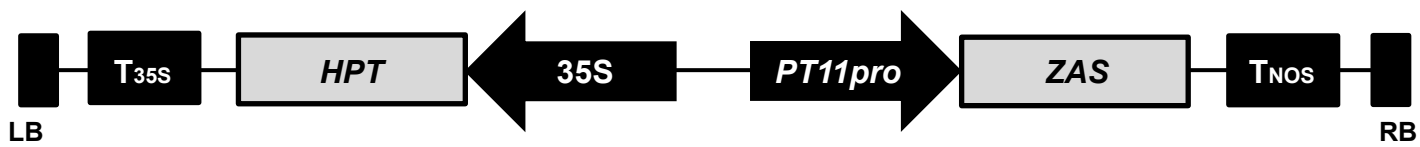

(b)

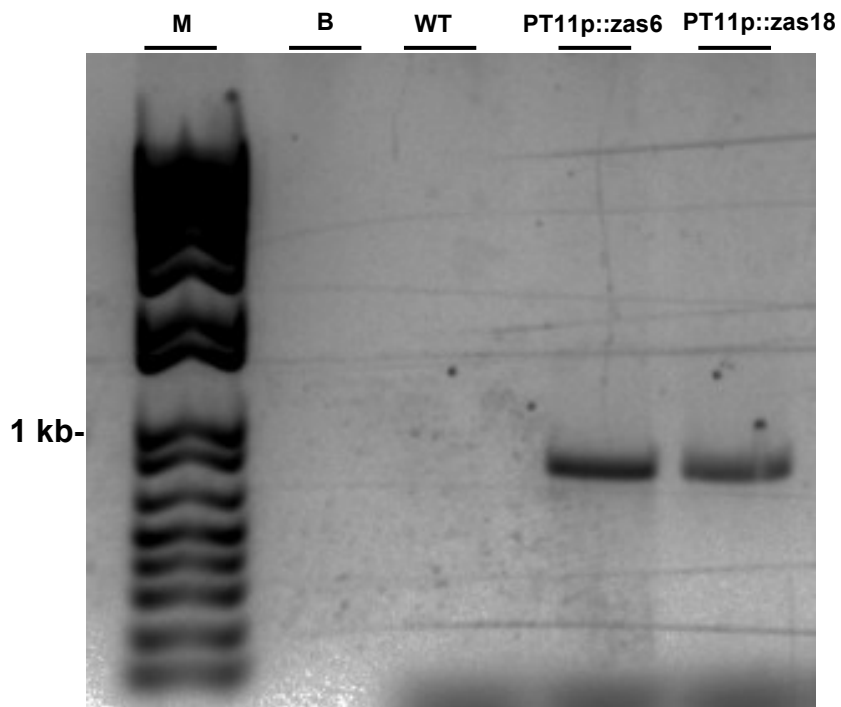

Figure S11

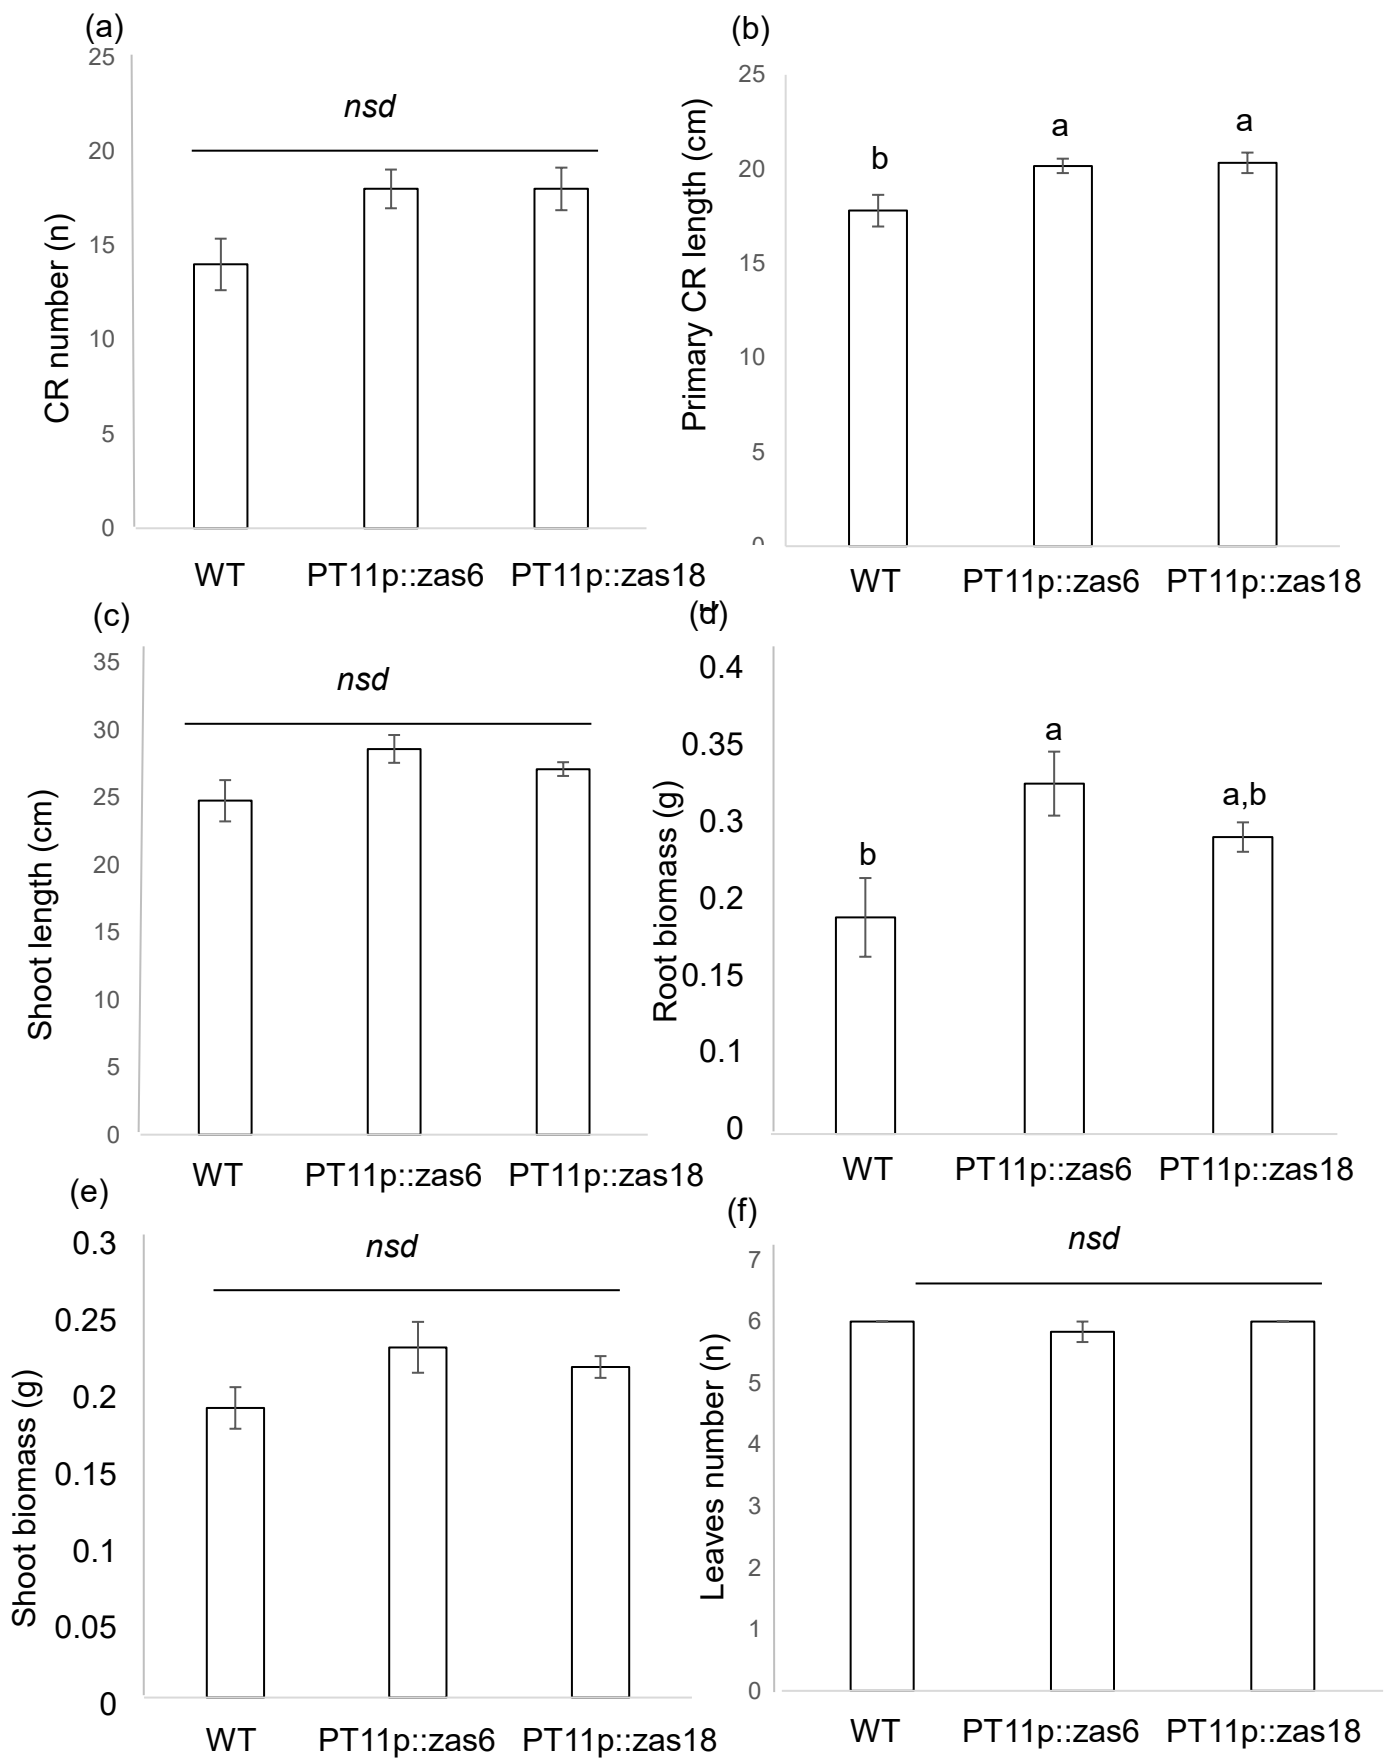

Figure S12

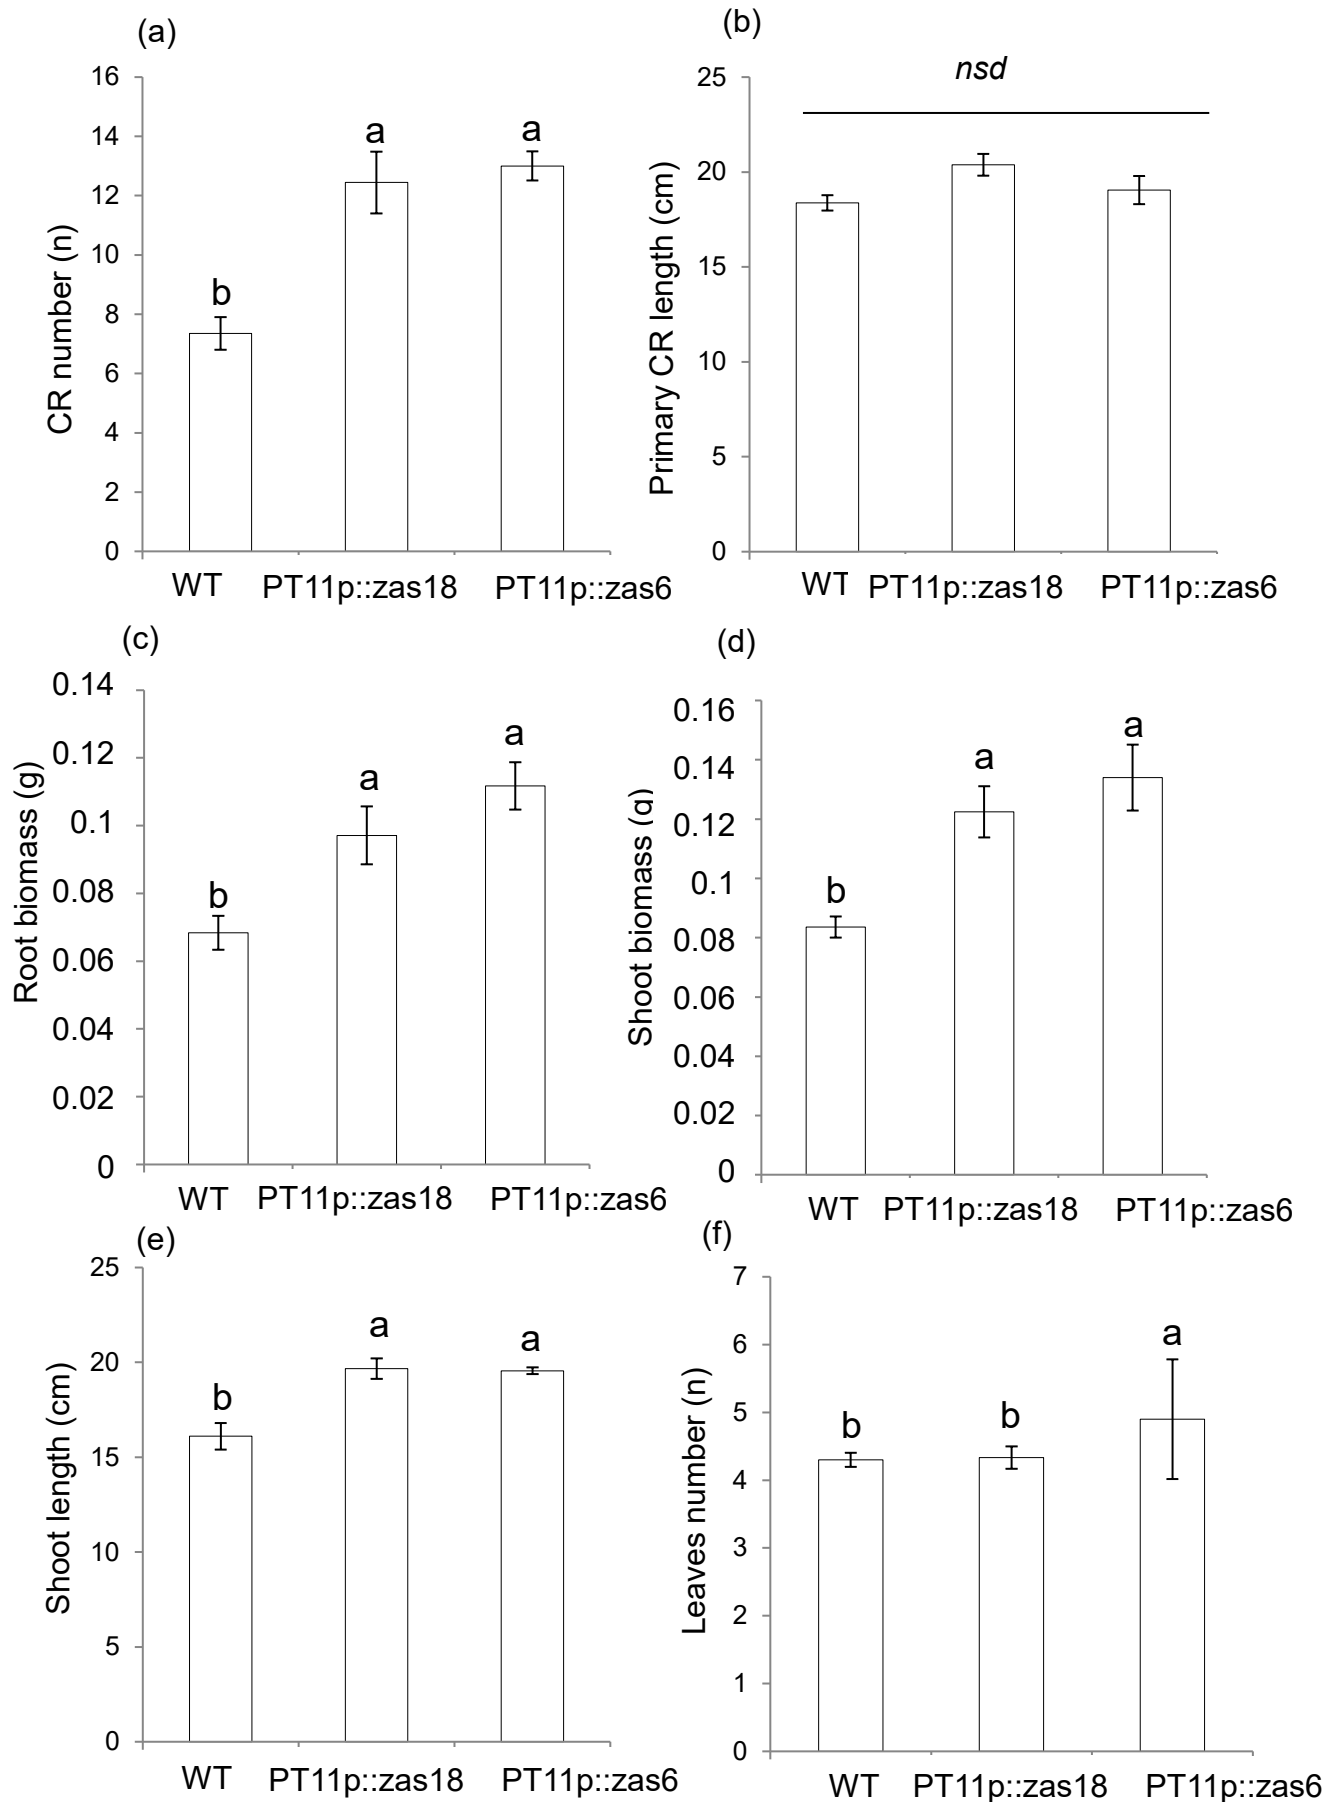

Figure S13

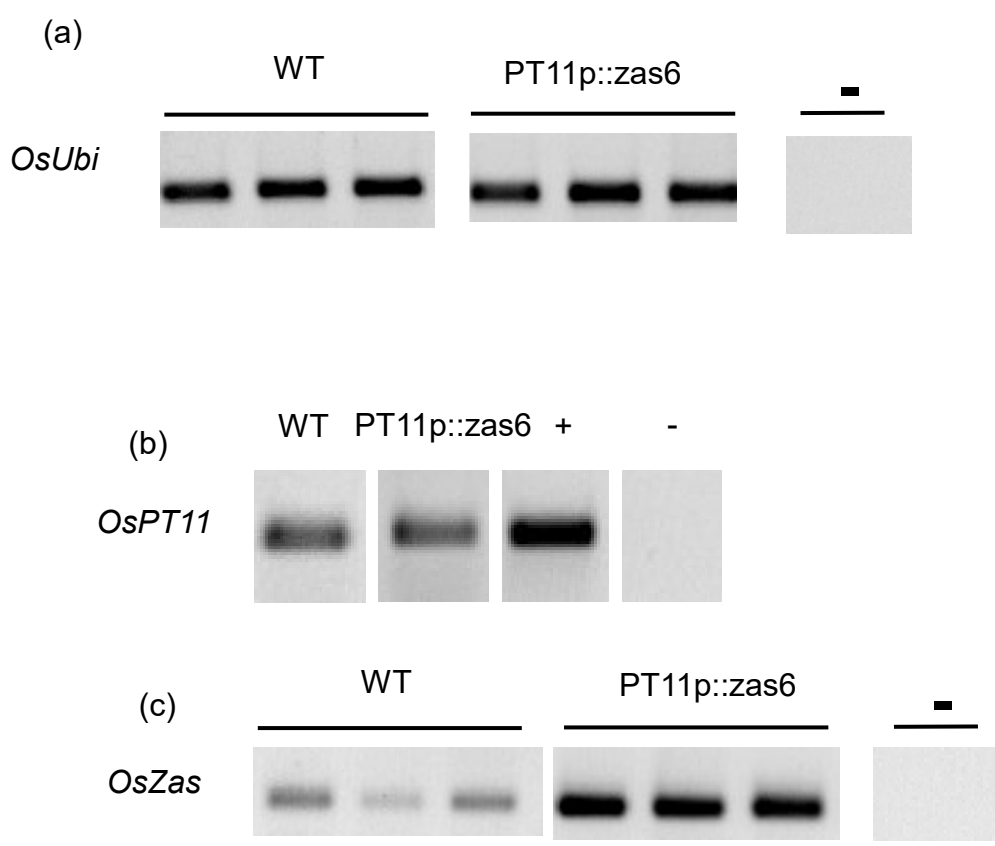

Figure S14

**Table S1: Phytohormones quantification (pmol/g FW) in WT and zas non-mycorrhizal and mycorrhizal roots in a time course experiment.**

|                                 |       |      | Sample n                                           | ABA                                                 |                                      |    |
|---------------------------------|-------|------|----------------------------------------------------|-----------------------------------------------------|--------------------------------------|----|
|                                 |       |      |                                                    | Raw data                                            | Mean                                 | SD |
| Roots of Non-mycorrhizal plants | 10DPG | WT   | 1                                                  | 16,85                                               | <b>18,41 ± 1,01</b><br><i>RSD 5%</i> |    |
|                                 |       |      | 2                                                  | 19,67                                               |                                      |    |
|                                 |       |      | 3                                                  | 18,56                                               |                                      |    |
|                                 |       |      | 4                                                  | 18,57                                               |                                      |    |
|                                 | zas   | 1    | 8,18                                               | <b>8,34 ± 0,70</b><br><i>RSD 8%</i><br>*** / 0,0000 |                                      |    |
|                                 |       | 2    | 7,82                                               |                                                     |                                      |    |
|                                 |       | 3    | 9,52                                               |                                                     |                                      |    |
|                                 |       | 4    | 7,83                                               |                                                     |                                      |    |
|                                 | 20DPG | WT   | 1                                                  | 2,86                                                | <b>3,36 ± 0,61</b><br><i>RSD 18%</i> |    |
|                                 |       |      | 2                                                  | 4,07                                                |                                      |    |
|                                 |       |      | 3                                                  | 2,67                                                |                                      |    |
|                                 |       |      | 4                                                  | 3,86                                                |                                      |    |
| zas                             | 1     | 6,00 | <b>5,92 ± 0,48</b><br><i>RSD 8%</i><br>** / 0,0015 |                                                     |                                      |    |
|                                 | 2     | 6,67 |                                                    |                                                     |                                      |    |
|                                 | 3     | 5,47 |                                                    |                                                     |                                      |    |
|                                 | 4     | 5,53 |                                                    |                                                     |                                      |    |
| 45DPG                           | WT    | 1    | 5,95                                               | <b>7,72 ± 1,67</b><br><i>RSD 22%</i>                |                                      |    |
|                                 |       | 2    | 6,49                                               |                                                     |                                      |    |
|                                 |       | 3    | 10,22                                              |                                                     |                                      |    |
|                                 |       | 4    | 8,22                                               |                                                     |                                      |    |
| zas                             | 1     | 3,35 | <b>3,31 ± 0,42</b><br><i>RSD 13%</i><br>* / 0,0165 |                                                     |                                      |    |
|                                 | 2     | 3,96 |                                                    |                                                     |                                      |    |
|                                 | 3     | 3,14 |                                                    |                                                     |                                      |    |
|                                 | 4     | 2,80 |                                                    |                                                     |                                      |    |
| Roots of mycorrhizal plants     | 45DPG | WT   | 1                                                  | 3,75                                                | <b>3,61 ± 0,36</b><br><i>RSD 10%</i> |    |
|                                 |       |      | 2                                                  | 4,07                                                |                                      |    |
|                                 |       |      | 3                                                  | 3,08                                                |                                      |    |
|                                 |       |      | 4                                                  | 3,55                                                |                                      |    |
|                                 | zas   | 1    | 5,41                                               | <b>5,29 ± 0,54</b><br><i>RSD 10%</i><br>** / 0,0057 |                                      |    |
|                                 |       | 2    | 6,04                                               |                                                     |                                      |    |
|                                 |       | 3    | 4,53                                               |                                                     |                                      |    |
|                                 |       | 4    | 5,19                                               |                                                     |                                      |    |

Table S2: Gibberellin quantification (pmol/g FW) in WT and zas non-mycorrhizal and mycorrhizal roots.

|                                 |       |     | Sample n | 13-non-hydroxylated gibberellin content (pmol/g DW) |                  |                  |                 |                 |                 |                  |                  |                  |                 |                 |              |             |              |             |             |             |             |             |             |             |             |
|---------------------------------|-------|-----|----------|-----------------------------------------------------|------------------|------------------|-----------------|-----------------|-----------------|------------------|------------------|------------------|-----------------|-----------------|--------------|-------------|--------------|-------------|-------------|-------------|-------------|-------------|-------------|-------------|-------------|
|                                 |       |     |          | GA <sub>15</sub>                                    | GA <sub>24</sub> | GA <sub>13</sub> | GA <sub>9</sub> | GA <sub>7</sub> | GA <sub>4</sub> | GA <sub>51</sub> | GA <sub>34</sub> | GA <sub>10</sub> | GA <sub>1</sub> | GA <sub>1</sub> |              |             |              |             |             |             |             |             |             |             |             |
| Roots of non-mycorrhizal plants | 10DPG | WT  | 1        | 0.23                                                | <b>0.19</b>      | 0.22             | <b>0.26</b>     | 0.03            | <b>0.03</b>     | 0.24             | <b>0.20</b>      | 0.11             | <b>0.09</b>     | 3.70            | <b>2.08</b>  | 15.87       | <b>11.70</b> | 0.14        | <b>0.15</b> | 0.12        | <b>0.06</b> | 0.03        | <b>0.06</b> | 0.28        | <b>0.29</b> |
|                                 |       |     | 2        | 0.17                                                | <b>0.02</b>      | 0.50             | <b>0.14</b>     | 0.03            | <b>0.01</b>     | 0.18             | <b>0.03</b>      | 0.09             | <b>0.01</b>     | 1.84            | <b>7.01</b>  | 14.22       | <b>4.63</b>  | 0.33        | <b>0.11</b> | 0.04        | <b>0.03</b> | 0.12        | <b>0.04</b> | 0.29        | <b>0.07</b> |
|                                 |       |     | 3        | 0.19                                                |                  | 0.18             |                 | 0.04            |                 | 0.20             |                  | 0.08             |                 | 0.92            |              | 12.93       |              | 0.03        |             | 0.05        |             | 0.04        |             | 0.28        |             |
|                                 |       |     | 4        | 0.17                                                |                  | 0.16             |                 | 0.02            |                 | 0.18             |                  | 0.08             |                 | 1.88            |              | 3.90        |              | 0.11        |             | 0.04        |             | 0.06        |             | 0.31        |             |
|                                 |       | zas | 1        | 0.36                                                | <b>0.21</b>      | 0.23             | <b>0.17</b>     | 0.02            | <b>0.03</b>     | 0.41             | <b>0.28</b>      | 0.13             | <b>0.10</b>     | 0.97            | <b>1.77</b>  | 1.04        | <b>16.51</b> | 0.27        | <b>0.17</b> | 0.21        | <b>0.21</b> | 0.07        | <b>0.06</b> | 0.30        | <b>0.32</b> |
|                                 |       |     | 2        | 0.14                                                | <b>0.09</b>      | 0.13             | <b>0.04</b>     | 0.06            | <b>0.02</b>     | 0.15             | <b>0.13</b>      | 0.09             | <b>0.03</b>     | 1.77            | <b>1.13</b>  | 28.54       | <b>11.65</b> | 0.11        | <b>0.06</b> | 0.22        | <b>0.01</b> | 0.10        | <b>0.03</b> | 0.34        | <b>0.02</b> |
|                                 |       |     | 3        | 0.16                                                |                  | 0.15             |                 | 0.03            |                 | <b>ND</b>        |                  | 0.11             |                 | 3.60            |              | 9.47        |              | 0.12        |             | 0.19        |             | 0.06        |             | 0.31        |             |
|                                 |       |     | 4        | 0.17                                                |                  | 0.16             |                 | 0.02            |                 | <b>ND</b>        |                  | 0.06             |                 | 0.72            |              | 26.97       |              | 0.18        |             | 0.21        | <b>***</b>  | 0.02        |             | 0.33        |             |
|                                 | 20DPG | WT  | 1        | 0.10                                                | <b>0.12</b>      | 0.30             | <b>0.21</b>     | 0.07            | <b>0.03</b>     | <b>ND</b>        | <b>0.46</b>      | 0.06             | <b>0.06</b>     | 1.17            | <b>1.95</b>  | 2.94        | <b>17.00</b> | 0.03        | <b>0.07</b> | 0.20        | <b>0.20</b> | 0.01        | <b>0.03</b> | 0.21        | <b>0.21</b> |
|                                 |       |     | 2        | 0.13                                                | <b>0.01</b>      | 0.13             | <b>0.09</b>     | 0.02            | <b>0.02</b>     | 0.30             | <b>0.16</b>      | 0.09             | <b>0.01</b>     | 3.07            | <b>0.69</b>  | 8.89        | <b>11.28</b> | 0.03        | <b>0.05</b> | 0.21        | <b>0.03</b> | 0.05        | <b>0.02</b> | 0.20        | <b>0.01</b> |
|                                 |       |     | 3        | 0.11                                                |                  | 0.31             |                 | 0.02            |                 | 0.62             |                  | 0.05             |                 | 1.80            |              | 28.31       |              | 0.16        |             | 0.25        |             | 0.01        |             | 0.23        |             |
|                                 |       |     | 4        | 0.12                                                |                  | 0.11             |                 | 0.02            |                 | <b>ND</b>        |                  | 0.06             |                 | 1.76            |              | 27.86       |              | 0.08        |             | 0.15        |             | 0.03        |             | 0.20        |             |
|                                 |       | zas | 1        | 0.74                                                | <b>0.46</b>      | 0.49             | <b>0.42</b>     | 0.87            | <b>0.40</b>     | 0.13             | <b>0.21</b>      | 0.75             | <b>0.78</b>     | 12.47           | <b>11.03</b> | 7.96        | <b>6.68</b>  | 0.17        | <b>0.21</b> | 1.06        | <b>1.08</b> | 0.05        | <b>0.14</b> | 1.11        | <b>1.10</b> |
|                                 |       |     | 2        | 0.20                                                | <b>0.29</b>      | 0.59             | <b>0.16</b>     | 0.20            | <b>0.29</b>     | 0.21             | <b>0.08</b>      | 0.71             | <b>0.37</b>     | 9.51            | <b>2.65</b>  | 12.52       | <b>3.96</b>  | 0.28        | <b>0.04</b> | 1.20        | <b>0.08</b> | 0.19        | <b>0.07</b> | 1.10        | <b>0.29</b> |
|                                 |       |     | 3        | 0.77                                                |                  | 0.15             |                 | 0.12            |                 | 0.35             |                  | 0.31             |                 | 7.62            |              | 2.18        |              | 0.19        |             | 1.11        |             | 0.10        |             | 0.69        |             |
|                                 |       |     | 4        | 0.15                                                | *                | 0.44             | -               | 0.39            | *               | 0.16             | -                | 1.35             | *               | 14.51           | <b>***</b>   | 4.08        | -            | 0.22        | <b>**</b>   | 0.97        | <b>***</b>  | 0.22        | *           | 1.52        | <b>***</b>  |
|                                 | 45DPG | WT  | 1        | 0.13                                                | <b>0.41</b>      | 3.83             | <b>3.25</b>     | 0.02            | <b>0.02</b>     | 0.92             | <b>0.52</b>      | 0.08             | <b>0.07</b>     | 2.85            | <b>2.21</b>  | 8.49        | <b>9.00</b>  | 0.31        | <b>0.21</b> | 0.43        | <b>0.35</b> | 0.03        | <b>0.01</b> | 0.23        | <b>0.22</b> |
|                                 |       |     | 2        | 0.54                                                | <b>0.32</b>      | 2.04             | <b>0.76</b>     | 0.02            | <b>0.00</b>     | 0.65             | <b>0.30</b>      | 0.04             | <b>0.02</b>     | 1.95            | <b>0.38</b>  | 7.80        | <b>2.05</b>  | 0.12        | <b>0.12</b> | 0.22        | <b>0.08</b> | 0.01        | <b>0.01</b> | 0.23        | <b>0.01</b> |
|                                 |       |     | 3        | 0.08                                                |                  | 3.95             |                 | 0.02            |                 | 0.35             |                  | 0.07             |                 | 1.90            |              | 12.47       |              | 0.07        |             | 0.38        |             | 0.01        |             | 0.21        |             |
|                                 |       |     | 4        | 0.87                                                |                  | 3.19             |                 | 0.02            |                 | 0.13             |                  | 0.08             |                 | 2.14            |              | 7.23        |              | 0.35        |             | 0.37        |             | 0.01        |             | 0.21        |             |
|                                 |       | zas | 1        | 0.15                                                | <b>0.25</b>      | 1.77             | <b>3.61</b>     | 0.36            | <b>0.31</b>     | 0.15             | <b>0.14</b>      | 0.09             | <b>0.10</b>     | 3.25            | <b>1.63</b>  | 3.66        | <b>2.82</b>  | 0.24        | <b>0.21</b> | 1.78        | <b>1.69</b> | 0.02        | <b>0.03</b> | 0.38        | <b>0.41</b> |
|                                 |       |     | 2        | 0.18                                                | <b>0.11</b>      | 3.44             | <b>1.45</b>     | 0.26            | <b>0.09</b>     | 0.20             | <b>0.04</b>      | 0.14             | <b>0.02</b>     | 1.64            | <b>1.05</b>  | 2.18        | <b>0.82</b>  | 0.17        | <b>0.03</b> | 1.75        | <b>0.17</b> | 0.03        | <b>0.01</b> | 0.47        | <b>0.06</b> |
|                                 |       |     | 3        | 0.43                                                |                  | 5.84             |                 | 0.42            |                 | 0.09             |                  | 0.10             |                 | 1.28            |              | 3.60        |              | 0.19        |             | 1.84        |             | 0.04        |             | 0.46        |             |
|                                 |       |     | 4        | 0.24                                                | -                | 3.40             | -               | 0.20            | <b>***</b>      | 0.13             | -                | 0.09             | <b>*</b>        | 0.33            | -            | 1.86        | <b>**</b>    | 0.25        | -           | 1.39        | <b>***</b>  | 0.04        |             | 0.32        | <b>**</b>   |
| Roots of mycorrhizal roots      | 45DPG | WT  | 1        | 0.29                                                | <b>0.39</b>      | 5.77             | <b>6.50</b>     | 0.02            | <b>0.02</b>     | 0.32             | <b>0.39</b>      | 0.06             | <b>0.06</b>     | 3.10            | <b>1.11</b>  | 2.84        | <b>8.85</b>  | 0.25        | <b>0.21</b> | 0.04        | <b>0.07</b> | 0.01        | <b>0.02</b> | 0.19        | <b>0.21</b> |
|                                 |       |     | 2        | 0.56                                                | <b>0.15</b>      | 5.38             | <b>1.58</b>     | 0.02            | <b>0.00</b>     | 0.15             | <b>0.18</b>      | 0.08             | <b>0.01</b>     | 0.31            | <b>1.15</b>  | 11.61       | <b>6.08</b>  | 0.18        | <b>0.05</b> | 0.07        | <b>0.02</b> | 0.04        | <b>0.01</b> | 0.23        | <b>0.01</b> |
|                                 |       |     | 3        | 0.20                                                |                  | 9.23             |                 | 0.02            |                 | 0.45             |                  | 0.07             |                 | 0.58            |              | 17.51       |              | 0.27        |             | 0.06        |             | 0.01        |             | 0.21        |             |
|                                 |       |     | 4        | 0.52                                                |                  | 5.62             |                 | 0.02            |                 | 0.63             |                  | 0.05             |                 | 0.44            |              | 3.43        |              | 0.14        |             | 0.10        |             | 0.01        |             | 0.20        |             |
|                                 | zas   | 1   | 0.16     | <b>0.16</b>                                         | 1.13             | <b>1.75</b>      | 0.02            | <b>0.03</b>     | 0.98            | <b>0.84</b>      | 0.06             | <b>0.06</b>      | 0.35            | <b>1.14</b>     | 10.06        | <b>7.82</b> | 0.22         | <b>0.20</b> | 0.18        | <b>0.17</b> | 0.03        | <b>0.06</b> | 0.28        | <b>0.22</b> |             |
|                                 |       | 2   | 0.16     | <b>0.01</b>                                         | 1.13             | <b>0.62</b>      | 0.03            | <b>0.00</b>     | 0.98            | <b>0.26</b>      | 0.04             | <b>0.01</b>      | 0.36            | <b>0.83</b>     | 7.63         | <b>2.39</b> | 0.17         | <b>0.08</b> | 0.14        | <b>0.06</b> | 0.02        | <b>0.04</b> | 0.21        | <b>0.04</b> |             |
|                                 |       | 3   | 0.14     |                                                     | 2.40             |                  | 0.02            |                 | 1.01            |                  | 0.07             |                  | 1.55            |                 | 4.00         |             | 0.10         |             | 0.26        |             | 0.13        |             | 0.21        |             |             |
|                                 |       | 4   | 0.18     | *                                                   | 2.33             | <b>**</b>        | 0.02            | -               | 0.40            | *                | 0.06             | -                | 2.29            | -               | 9.58         | -           | 0.32         | -           | 0.10        | *           | 0.08        | *           | 0.17        |             |             |



**Table S3. Primer sequences used in this study**

| Experiment                                         | Primer name                                               | Sequence (5'-3')                                    | Restriction enzyme                      |  |
|----------------------------------------------------|-----------------------------------------------------------|-----------------------------------------------------|-----------------------------------------|--|
| For pCAMB1300-OsPT11prom:OsZAS construct           | ZAS-F                                                     | ATGATGACAGCTTCTCTGCA                                |                                         |  |
|                                                    | ZAS-R                                                     | TCACGTCATTGTGTTTGCTAG                               |                                         |  |
|                                                    | Pro-PT11-F                                                | ACTGAATTCGTACAAATTCATTTTTTTAGCGAAGTTAGAAG           | <u>EcoRI</u>                            |  |
|                                                    | Pro-PT11-R                                                | CGTCTAGACTCCGATGATGCCGTCGAT                         | <u>XbaI</u>                             |  |
| For pCAMB1300-OsPT11prom:OsZAS transgenic PCR test | PT11prom-Fwd                                              | CTTGCAAGGGACAAAACAC                                 |                                         |  |
|                                                    | ZAS-Rev                                                   | AGTGGATTGGAACCAATTTCT                               |                                         |  |
| For gene expression analysis (RT-qPCR)             | OsZAS                                                     | F:CTCCATTGACCGTCTCAATCT<br>R:TGGCTTCTGTCTGGTTTTCTCA |                                         |  |
|                                                    | OsLysM                                                    | F:CGCTGACATGCAACAAGGTG<br>R:CTTCGCGCAGTTGATGTTTGG   |                                         |  |
|                                                    | OsPT11                                                    | F:GAGAAGTTCCTGCTCAAGCA<br>R:GAGAAGTTCCTGCTCAAGCA    |                                         |  |
|                                                    | OsRubQ1                                                   | F:GGGTTACAAGTCTGCCTATTTG<br>R:ACGGGACACGACCAAGGA    |                                         |  |
|                                                    | Fm. 18S                                                   | F:GCTATTTGATCATTGCCGCC<br>R:TCATTAACCGTTCTCCGACC    |                                         |  |
|                                                    | Oscdd8                                                    | F:GTTCCAGTACACGGACAAG<br>R:ACTGCCTCTCGTTGCTA        |                                         |  |
|                                                    | OsMAX1-1400                                               | F:ACGACGGCGTTCACTCTCTC<br>R:TCCGAACCCGTCATCTCC      |                                         |  |
|                                                    | OsD14L                                                    | F:GAAGCCATGGGGTCAAATA<br>R:GCGGCTAACTCCTGAACTG      |                                         |  |
|                                                    | OsSMAX1                                                   | F:AGGCATGGAGTTATAGATCT<br>R:ACCGATCAATCCTTGCAACA    |                                         |  |
|                                                    | For probe generation for the <i>in situ</i> hybridization | M13-F                                               | GTAAAACGACGGCCAGT                       |  |
|                                                    |                                                           | OsZAS-SP6-R                                         | CTATTTAGGTGACTATAGAcaccctctcaagcagttgat |  |
